# Supplementary material for: Neuromodulation of striatal D1 cells shapes BOLD fluctuations in anatomically connected thalamic and cortical regions
Source: eLife. 2023 Oct 12;12:e78620. doi: 10.7554/eLife.78620 (PMC10569790; doi:10.7554/eLife.78620)
Supplement: Supplementary file 1. — Full names of abbreviated ROIs: CPdm, caudate putamen dorsomedial; SNr, substantia nigra reticular part; GPi, globus pallidus internal; VPL, ventral posterolateral nucleus of thalamus; RE|LH|RH, nucleus of reuniens|lateral habenula|rhomboid nucleus; PO|POL, posterior complex and posterior limiting nucleus of thalamus; SPF|SPA|PP, subparafascicular nucleus subparafascicular area with peripeduncular nucleus of thalamus; IMD, intermediodorsal nucleus of thalamus; RT, reticular nucleus of thalamus; AM, anteromedial nucleus; CL, central lateral nucleus of thalamus; PF, parafascicular nucleus; VAL|VPM|VPMpc, ventral anterior-lateral complex of the thalamus with ventral posteromedial nucleus of the thalamus and its parvicellular part; MD, mediodorsal nucleus of thalamus; LD, lateral dorsal nucleus of thalamus; LP, lateral posterior nucleus of thalamus; VM|CM, ventral and central medial nuclei of thalamus. [file elife-78620-supp1.xlsx]

## Sheet: Sheet1
		Thalamic nuclei/ROIs	Projections FROM CPidm (via Gpi/SNr)	Projections TO CPidm	Reference(s)
		CL	yes	yes	Parker et al., 2016; Wall et la., 2013; Guo et al., 2015; Kamishina et al., 2008
		CM	yes	yes	Wall et al., 2013; Parker et al., 2016;
		PF	yes	yes	Mandelbaum et al., 2019; Lee at al., 2020; Wall et al., 2013
		MD	yes	yes	Hunnicutt et al., 2016; Collins et al.,2018; Wall et al., 2013
		LP	yes	yes	Guo et al., 2015; Evangelio et al., 2018; Kamishina et al., 2008; Alloway et al., 2017;
		LD	yes	yes	Hunnicutt et al., 2016; Perry & Mitchell, 2019;
		VM	yes	yes	Lee et al., 2020; Wall et al., 2013; Collins et al., 2018
		RE	no	no	Vertes et al., 2016;
		LH	no	no	Namboodiri et al., 2016
		RH	no	yes (to dorsal CP but scarce)	Parker et al., 2016; Vertes et al., 2016
		PO	no	no	El-Boustani et al., 2020; Kamishina et al., 2008; Alloway et al., 2017;
		POL	no	no	El-Boustani et al., 2020; Alloway et al., 2017
		IMD	no	no	Van der Werf et al., 2002; Smith et al., 2004
		RT	no	no	Antal et al., 2014; Hunnicutt et al., 2016;
		AM	no	yes (to dorsal CP but scarce)	Perry & Mitchell, 2019; Wall et al., 2013; Bubb et al., 2017
		VPL	no	no/scarce	Antal et al., 2014; Diaz-Hernandes et al., 2018; Erro et al., 2002
		VPM/VPMpc	no/scarce	no	Hunnicutt et al., 2016; Diaz-Hernandes et al., 2018
		VAL	no	no	Alloyway et la., 2017; Smith et al., 2004;
		SPF	no	no	Palkovits et al., 2006; Oh et al., 2014
		SPA	no	no	Palkovits et al., 2006; Oh et al., 2014
		PP	no	no	Linke et al., 2000; Oh et al., 2014
