# Supplementary material for: Neuromodulation of striatal D1 cells shapes BOLD fluctuations in anatomically connected thalamic and cortical regions
Source: eLife. 2023 Oct 12;12:e78620. doi: 10.7554/eLife.78620 (PMC10569790; doi:10.7554/eLife.78620)
Supplement: Supplementary file 2. [file elife-78620-supp2.xlsx]

## Sheet: VM|CM
VM|CM - FEATUREs	Feature scores	permutation p_value (uncorr)	FDR_corrected p_value					FDR_corrected p_value		0.00663
[2600]PH_Walker_prop_05_w_std(trend):	3.98	6.99e-06,	0.00663					0.00663		0.00663
[2601]PH_Walker_prop_05_w_ac1(trend):	-3.98	6.99e-06,	0.00663					0.00663		0.00663
[2602]PH_Walker_prop_05_w_ac2(trend):	-3.98	6.99e-06,	0.00663					0.00663		0.00663
[3121]FC_LocalSimple_median3_stderr(forecasting):	-3.98	6.99e-06,	0.00663					0.00663		0.00663
[3070]FC_LocalSimple_mean3_stderr(forecasting):	3.87	1.22e-05,	0.00663					0.00663		0.00663
[4494]SP_Summaries_welch_rect_fpolysat_a(FourierSpectrum):	3.87	1.22e-05,	0.00663					0.00663		0.00663
[4618]SP_Summaries_fft_fpolysat_a(FourierSpectrum):	3.87	1.22e-05,	0.00663					0.00663		0.00663
[6418]WL_cwt_db3_32_meanabsC(wavelet,cwt):	-3.87	1.22e-05,	0.00663					0.00663		0.00663
[6444]WL_cwt_sym2_32_meanabsC(wavelet,cwt):	-3.87	1.22e-05,	0.00663					0.00663		0.00663
[2672]PH_Walker_biasprop_05_01_sw_propcross(trend):	3.76	1.57e-05,	0.00663					0.00663		0.00663
[7194]MF_CompareAR_1_10_all_maxv(model):	3.76	1.75e-05,	0.00663					0.00663		0.00663
[7200]MF_CompareAR_1_10_all_meandiff(model):	3.76	1.75e-05,	0.00663					0.00663		0.00663
[2622]PH_Walker_prop_09_w_ac2(trend):	3.76	1.92e-05,	0.00663					0.00663		0.00663
[4206]SC_FluctAnal_2_dfa_50_3_logi_r2_ssr(scaling):	-3.76	1.92e-05,	0.00663					0.00663		0.00663
[3180]FC_LocalSimple_lfit5_stderr(forecasting):	-3.76	2.1e-05,	0.00663					0.00663		0.00663
[7201]MF_CompareAR_1_10_all_stddiff(model):	-3.76	2.1e-05,	0.00663					0.00663		0.00663
[2592]PH_Walker_prop_01_sw_propcross(trend):	3.66	2.62e-05,	0.00663					0.00663		0.00663
[3159]FC_LocalSimple_lfit3_meanabserr(forecasting):	3.65	2.8e-05,	0.00663					0.00663		0.00663
[1899]CO_TranslateShape_rectangle_2_pts_statav3_m(correlation,stationarity):	3.65	2.97e-05,	0.00663					0.00663		0.0083
[3169]FC_LocalSimple_lfit4_meanabserr(forecasting):	3.65	2.97e-05,	0.00663					0.0083		0.0083
[94]AC_2(correlation):	3.65	2.97e-05,	0.00663					0.0083		0.0083
[1130]CO_trev_2_denom(correlation,nonlinear):	3.65	2.97e-05,	0.00663					0.0083		0.0083
[1145]CO_trev_mi_denom(correlation,nonlinear):	3.65	2.97e-05,	0.00663					0.0083		0.0083
[2642]PH_Walker_prop_11_w_ac2(trend):	3.65	2.97e-05,	0.00663					0.0083		0.0083
[4495]SP_Summaries_welch_rect_fpolysat_b(FourierSpectrum):	3.65	2.97e-05,	0.00663					0.0083		0.0083
[4536]SP_Summaries_welch_rect_area_3_2(FourierSpectrum):	3.65	2.97e-05,	0.00663					0.0083		0.0083
[4619]SP_Summaries_fft_fpolysat_b(FourierSpectrum):	3.65	2.97e-05,	0.00663					0.0083		0.0083
[4660]SP_Summaries_fft_area_3_2(FourierSpectrum):	-3.65	2.97e-05,	0.00663					0.0083		0.0083
[2742]PH_Walker_runningvar_15_50_w_ac2(trend):	-3.65	3.15e-05,	0.00663					0.0083		0.0083
[4204]SC_FluctAnal_2_dfa_50_3_logi_r2_se1(scaling):	-3.65	3.15e-05,	0.00663					0.0083		0.0083
[7082]MF_StateSpace_n4sid_1_05_1_m_fpe(model):	-3.65	3.15e-05,	0.00663					0.0083		0.0083
[194]RM_ami_1(information,correlation,AMI):	-3.65	3.32e-05,	0.00663					0.0083		0.0083
[3179]FC_LocalSimple_lfit5_meanabserr(forecasting):	-3.65	3.32e-05,	0.00663					0.0083		0.0083
[2344]FC_Surprise_T1_50_3_q_500_lq(information,symbolic):	3.56	4.37e-05,	0.0083					0.0083		0.0083
[229]CO_HistogramAMI_std2_5bin_ami1(information,correlation,AMI):	3.55	4.72e-05,	0.0083					0.0083		0.0083
[2747]PH_Walker_runningvar_15_50_sw_meanabsdiff(trend):	3.55	4.72e-05,	0.0083					0.0083		0.0083
[7083]MF_StateSpace_n4sid_1_05_1_m_aic(model):	3.55	4.89e-05,	0.0083					0.0083		0.0083
[249]CO_HistogramAMI_even_10bin_ami1(information,correlation,AMI):	-3.55	5.24e-05,	0.0083					0.0083		0.0083
[2177]SY_SpreadRandomLocal_50_100_meanac2(stationarity):	-3.55	5.24e-05,	0.0083					0.0083		0.0083
[7202]MF_CompareAR_1_10_all_maxdiff(model):	-3.55	5.24e-05,	0.0083					0.0083		0.0083
[2813]EN_mse_1-10_2_015_sampen_s8(entropy,sampen,mse):	3.44	6.99e-05,	0.0083					0.0083		0.0083
[2981]EN_Randomize_dyndist_swss5_1fexpc(entropy,slow,stationarity):	3.44	6.99e-05,	0.0083					0.0083		0.0083
[136]first1e_acf_point(correlation,timescale):	3.44	6.99e-05,	0.0083					0.0083		0.0083
[871]EN_CID_CE2(entropy):	3.44	6.99e-05,	0.0083					0.0083		0.00987
[875]EN_CID_CE2_norm(entropy):	3.44	6.99e-05,	0.0083					0.00987		0.00987
[2643]PH_Walker_prop_11_w_tau(trend):	3.44	6.99e-05,	0.0083					0.00987		0.00987
[3060]FC_LocalSimple_mean2_stderr(forecasting):	3.44	6.99e-05,	0.0083					0.00987		0.00987
[6605]MF_arfit_1_8_sbc_fpe_1(modelfit,arfit):	-3.44	6.99e-05,	0.0083					0.00987		0.00663
[7532]SY_PPtest_0_5_ar_t1_minstat(unitroot):	-3.44	6.99e-05,	0.0083					0.00987		0.00663
[4534]SP_Summaries_welch_rect_area_3_1(FourierSpectrum):	-3.44	7.17e-05,	0.0083					0.00987		0.00663
[4658]SP_Summaries_fft_area_3_1(FourierSpectrum):	-3.44	7.17e-05,	0.0083					0.00987		0.00663
[7209]MF_CompareAR_1_10_all_bestaic(model):	-3.44	7.17e-05,	0.0083					0.00987		0.00663
[1365]SB_TransitionMatrix_41_maxeigcov(symbolic,transitionmat):	-3.44	7.34e-05,	0.0083					0.00987		0.00663
[1384]SB_TransitionMatrix_51_stdeigcov(symbolic,transitionmat):	-3.44	7.52e-05,	0.0083					0.00987		0.00663
[3692]SB_MotifThree_quantile_hhh(symbolic,motifs):	-3.44	7.52e-05,	0.0083					0.0107		0.00663
[6857]MF_steps_ahead_ar_2_6_maxdiffrms(model,prediction):	-3.44	7.52e-05,	0.0083					0.0107		0.00663
[1266]CO_AddNoise_1_gaussian_ami_at_5(correlation,AMI,entropy):	-3.44	7.69e-05,	0.0083					0.0118		0.00663
[1382]SB_TransitionMatrix_51_maxeigcov(symbolic,transitionmat):	-3.44	7.69e-05,	0.0083					0.0118		0.00663
[3197]FC_LocalSimple_lfittau_tauresrat(forecasting):	-3.44	7.69e-05,	0.0083					0.0118		0.00663
[3695]SB_MotifThree_quantile_aaac(symbolic,motifs):	3.35	8.92e-05,	0.0083					0.0118		0.00663
[269]IN_AutoMutualInfoStats_40_gaussian_ami1(information,correlation,AMI):	3.34	0.000105,	0.0083					0.0118		0.00663
[753]SY_StdNthDer_1(entropy):	3.34	0.000105,	0.0083					0.0135		0.0083
[1125]CO_trev_1_denom(correlation,nonlinear):	3.34	0.000105,	0.0083					0.0135		0.0083
[3059]FC_LocalSimple_mean2_meanabserr(forecasting):	3.34	0.000105,	0.0083					0.0135		0.0083
[3170]FC_LocalSimple_lfit4_stderr(forecasting):	3.34	0.000105,	0.0083					0.0135		0.0083
[3896]MF_AR_arcov_1_res_std(model,gof):	3.34	0.000105,	0.0083					0.0135		0.0083
[7339]MF_ExpSmoothing_05_best_stde(model):	3.34	0.000105,	0.0083					0.0135		0.0083
[7340]MF_ExpSmoothing_05_best_mms(model):	3.34	0.000105,	0.0083					0.0135		0.0083
[7530]SY_PPtest_0_5_ar_t1_meanstat(unitroot):	3.34	0.000105,	0.0083					0.0135		0.0083
[7533]SY_PPtest_0_5_ar_t1_minBIC(unitroot):	3.34	0.000105,	0.0083					0.0135		0.0083
[7534]SY_PPtest_0_5_ar_t1_minrmse(unitroot):	3.34	0.000105,	0.0083					0.0135		0.0083
[7593]MD_hrv_classic_SD2(medical):	3.34	0.000105,	0.0083					0.0135		0.0083
[167]AC_nl_002(correlation,nonlinearautocorr):	3.34	0.000107,	0.0083					0.0135		0.0083
[1200]CO_AddNoise_1_even_10_fitlinb(correlation,AMI,entropy):	3.34	0.000107,	0.0083					0.0135		0.0083
[1275]CO_AddNoise_1_gaussian_fitlinb(correlation,AMI,entropy):	3.34	0.000107,	0.0083					0.0174		0.0083
[2019]CO_Embed2_Dist_tau_d_mean(correlation,embedding):	3.34	0.000107,	0.0083					0.02		0.0083
[2647]PH_Walker_prop_11_sw_meanabsdiff(trend):	3.34	0.000107,	0.0083					0.02		0.0083
[4205]SC_FluctAnal_2_dfa_50_3_logi_r2_se2(scaling):	3.34	0.000108,	0.0083					0.02		0.0083
[4458]SP_Summaries_welch_rect_w_weighted_peak_prom(FourierSpectrum):	3.34	0.000108,	0.0083					0.02		0.0083
[4544]SP_Summaries_welch_rect_area_4_2(FourierSpectrum):	3.34	0.000108,	0.0083					0.02		0.0083
[4582]SP_Summaries_fft_w_weighted_peak_prom(FourierSpectrum):	3.34	0.000108,	0.0083					0.02		0.0083
[4668]SP_Summaries_fft_area_4_2(FourierSpectrum):	3.34	0.000108,	0.0083					0.02		0.0083
[1367]SB_TransitionMatrix_41_stdeigcov(symbolic,transitionmat):	3.34	0.000108,	0.0083					0.02		0.0083
[2209]SY_SpreadRandomLocal_200_100_meanac2(stationarity):	-3.34	0.000112,	0.0083					0.02		0.0083
[4459]SP_Summaries_welch_rect_w_weighted_peak_height(FourierSpectrum):	-3.34	0.000112,	0.0083					0.02		0.0083
[4583]SP_Summaries_fft_w_weighted_peak_height(FourierSpectrum):	-3.34	0.000112,	0.0083					0.0201		0.0083
[259]CO_HistogramAMI_quantiles_5bin_ami1(information,correlation,AMI):	-3.34	0.000115,	0.0083					0.0203		0.0083
[4497]SP_Summaries_welch_rect_fpolysat_rmse(FourierSpectrum):	-3.34	0.000115,	0.0083					0.0203		0.0083
[4621]SP_Summaries_fft_fpolysat_rmse(FourierSpectrum):	-3.34	0.000115,	0.0083					0.0234		0.0083
[4491]SP_Summaries_welch_rect_fpoly2_sse(FourierSpectrum):	-3.34	0.000117,	0.0083					0.0234		0.0083
[4493]SP_Summaries_welch_rect_fpoly2_rmse(FourierSpectrum):	-3.34	0.000117,	0.0083					0.0234		0.0083
[4615]SP_Summaries_fft_fpoly2_sse(FourierSpectrum):	-3.34	0.000117,	0.0083					0.0234		0.0083
[4617]SP_Summaries_fft_fpoly2_rmse(FourierSpectrum):	-3.34	0.000117,	0.0083					0.0234		0.0083
[3606]SB_MotifTwo_mean_dddd(symbolic,motifs):	-3.29	0.000128,	0.00894					0.0234		0.0083
[93]AC_1(correlation):	3.24	0.000152,	0.00987					0.0234		0.0083
[7078]MF_StateSpace_n4sid_1_05_1_A_1(model):	3.24	0.000152,	0.00987					0.0234		0.0083
[2640]PH_Walker_prop_11_w_std(trend):	3.24	0.000154,	0.00987					0.0279		0.00894
[134]firstZero_acf_point(correlation,timescale):	3.24	0.000156,	0.00987					0.0279		0.00987
[2022]CO_Embed2_Dist_tau_d_expfit_nlogL(correlation,embedding):	-3.24	0.000156,	0.00987					0.0279
[4187]SC_FluctAnal_2_dfa_50_3_logi_se1(scaling):	-3.24	0.000156,	0.00987					0.0279
[4188]SC_FluctAnal_2_dfa_50_3_logi_se2(scaling):	-3.24	0.000156,	0.00987					0.028
[1480]SB_TransitionpAlphabet_40_1_mineigfexp_r2(symbolic,transitionmat):	-3.24	0.000159,	0.00987					0.028
[2743]PH_Walker_runningvar_15_50_w_tau(trend):	-3.24	0.000159,	0.00987					0.0286
[4542]SP_Summaries_welch_rect_area_4_1(FourierSpectrum):	-3.24	0.000159,	0.00987					0.0336	129/344
[4666]SP_Summaries_fft_area_4_1(FourierSpectrum):	-3.24	0.000159,	0.00987					0.0336
[2176]SY_SpreadRandomLocal_50_100_meanac1(stationarity):	-3.24	0.000166,	0.00987					0.0336
[2210]SY_SpreadRandomLocal_200_100_meantaul(stationarity):	-3.24	0.000166,	0.00987					0.0336
[4508]SP_Summaries_welch_rect_linfitloglog_lf_a1(FourierSpectrum):	-3.24	0.000166,	0.00987					0.0336
[4632]SP_Summaries_fft_linfitloglog_lf_a1(FourierSpectrum):	-3.24	0.000166,	0.00987					0.0336
[4496]SP_Summaries_welch_rect_fpolysat_r2(FourierSpectrum):	-3.24	0.000168,	0.00987					0.0336
[4620]SP_Summaries_fft_fpolysat_r2(FourierSpectrum):	-3.24	0.000168,	0.00987					0.0336
[6858]MF_steps_ahead_ar_2_6_stddiffrms(model,prediction):	-3.24	0.000168,	0.00987					0.0337
[4481]SP_Summaries_welch_rect_centroid(FourierSpectrum):	3.19	0.000185,	0.0107					0.034
[4605]SP_Summaries_fft_centroid(FourierSpectrum):	3.19	0.000185,	0.0107					0.034
[2626]PH_Walker_prop_09_w_propzcross(trend):	3.15	0.000215,	0.0118					0.0398
[234]CO_HistogramAMI_std2_10bin_ami1(information,correlation,AMI):	3.14	0.00022,	0.0118					0.0398
[1274]CO_AddNoise_1_gaussian_fitlina(correlation,AMI,entropy):	3.14	0.00022,	0.0118					0.0398
[2621]PH_Walker_prop_09_w_ac1(trend):	3.14	0.00022,	0.0118					0.0398
[2741]PH_Walker_runningvar_15_50_w_ac1(trend):	3.14	0.00022,	0.0118					0.0398
[6848]MF_steps_ahead_ar_2_6_ac1_4(model,prediction):	3.14	0.00022,	0.0118					0.0399
[7217]MF_CompareAR_1_10_05_stddiff(model):	3.14	0.00022,	0.0118					0.04
[7218]MF_CompareAR_1_10_05_maxdiff(model):	3.14	0.00022,	0.0118					0.0467
[7338]MF_ExpSmoothing_05_best_meanabs(model):	3.14	0.000222,	0.0118					0.0473
[2623]PH_Walker_prop_09_w_tau(trend):	-3.14	0.000226,	0.0118					0.0473
[3157]FC_LocalSimple_lfit2_tauresrat(forecasting):	-3.14	0.000227,	0.0118					0.0473
[3167]FC_LocalSimple_lfit3_tauresrat(forecasting):	-3.14	0.000227,	0.0118					0.0474
[4017]SC_FluctAnal_2_std_50_logi_linfitint(scaling):	-3.14	0.000227,	0.0118					0.0474
[1162]CO_AddNoise_1_quantiles_10_fitlinb(correlation,AMI,entropy):	-3.14	0.000231,	0.0118					0.0474
[2192]SY_SpreadRandomLocal_100_100_meanac1(stationarity):	-3.14	0.000231,	0.0118					0.0474
[2193]SY_SpreadRandomLocal_100_100_meanac2(stationarity):	-3.14	0.000238,	0.012					0.00663
[2707]PH_Walker_momentum_2_sw_meanabsdiff(trend):	-3.14	0.000239,	0.012					0.00663
[7112]MF_StateSpace_n4sid_2_05_1_A_2(model):	-3.14	0.000241,	0.012					0.00663
[4480]SP_Summaries_welch_rect_wmax_25(FourierSpectrum):	3.05	0.000304,	0.0135					0.00663
[4604]SP_Summaries_fft_wmax_25(FourierSpectrum):	3.05	0.000304,	0.0135					0.00663
[1270]CO_AddNoise_1_gaussian_fitexpa(correlation,AMI,entropy):	3.04	0.000308,	0.0135					0.00663
[1531]CO_AutoCorrShape_posDrown_sumacf(correlation):	3.04	0.000308,	0.0135					0.00663
[2597]PH_Walker_prop_01_res_ac1(trend):	3.04	0.000308,	0.0135					0.00663
[310]IN_AutoMutualInfoStats_40_gaussian_stdami(information,correlation,AMI):	3.04	0.000309,	0.0135					0.00663
[3120]FC_LocalSimple_median3_meanabserr(forecasting):	3.04	0.000309,	0.0135					0.00663
[7210]MF_CompareAR_1_10_05_maxv(model):	3.04	0.000309,	0.0135					0.00663
[7216]MF_CompareAR_1_10_05_meandiff(model):	3.04	0.000309,	0.0135					0.00663
[7225]MF_CompareAR_1_10_05_bestaic(model):	3.04	0.000309,	0.0135					0.00663
[2627]PH_Walker_prop_09_sw_meanabsdiff(trend):	3.04	0.000311,	0.0135					0.00663
[3050]FC_LocalSimple_mean1_meanabserr(forecasting):	3.04	0.000311,	0.0135					0.0083
[4397]SP_Summaries_pgram_hamm_linfitloglog_mf_sigma(FourierSpectrum):	3.04	0.000311,	0.0135					0.0083
[4398]SP_Summaries_pgram_hamm_linfitloglog_mf_sea1(FourierSpectrum):	3.04	0.000311,	0.0135					0.0083
[6851]MF_steps_ahead_ar_2_6_ac1_5(model,prediction):	3.04	0.000315,	0.0135					0.0083
[3177]FC_LocalSimple_lfit4_tauresrat(forecasting):	3.04	0.000318,	0.0135					0.0083
[3187]FC_LocalSimple_lfit5_tauresrat(forecasting):	3.04	0.000318,	0.0135					0.0083
[1944]CO_StickAngles_y_tau_n(correlation):	-3.04	0.000322,	0.0135					0.0083
[1945]CO_StickAngles_y_ac1_n(correlation):	-3.04	0.000322,	0.0135					0.0083
[2701]PH_Walker_momentum_2_w_ac1(trend):	-3.04	0.000322,	0.0135					0.0083
[4113]SC_FluctAnal_2_dfa_50_0_logi_linfitint(scaling):	-3.04	0.000322,	0.0135					0.0083
[1470]SB_TransitionpAlphabet_40_1_stdeigfexp_a(symbolic,transitionmat):	-3.04	0.000327,	0.0135					0.0083
[7095]MF_StateSpace_n4sid_1_05_1_ac2(model):	-3.04	0.000327,	0.0135					0.0083
[7098]MF_StateSpace_n4sid_1_05_1_ac2n(model):	-3.04	0.000327,	0.0135					0.0083
[3664]SB_MotifThree_quantile_hh(symbolic,motifs):	-3.04	0.00033,	0.0135					0.0083
[4041]SC_FluctAnal_2_iqr_50_logi_linfitint(scaling):	-3.04	0.00033,	0.0135					0.0083
[7354]MF_ExpSmoothing_05_best_acsnd0(model):	-3.04	0.00033,	0.0135					0.0083
[2540]FC_Surprise_T1_10_tau_m2quad_500_mean(information,symbolic):	-3.04	0.000334,	0.0135					0.0083
[3543]SB_BinaryStats_mean_stdstretch0(distribution,stationarity):	-3.04	0.000334,	0.0135					0.0083
[1110]CO_tc3_3_denom(correlation,nonlinear):	-3.04	0.000336,	0.0135					0.0083
[4492]SP_Summaries_welch_rect_fpoly2_r2(FourierSpectrum):	-3.04	0.000336,	0.0135					0.0083
[4616]SP_Summaries_fft_fpoly2_r2(FourierSpectrum):	-3.04	0.000336,	0.0135					0.0083
[1100]CO_tc3_1_denom(correlation,nonlinear):	2.95	0.00043,	0.0168					0.0083
[2800]EN_SampEn_5_02_diff1_sampen0(entropy,sampen,controlen):	2.95	0.00043,	0.0168					0.0083
[3085]FC_LocalSimple_mean4_ac2(forecasting):	2.95	0.00043,	0.0168					0.0083
[6854]MF_steps_ahead_ar_2_6_ac1_6(model,prediction):	-2.95	0.000432,	0.0168					0.0083
[6573]WL_dwtcoeff_sym2_5_stdd_l1(wavelet,dwt):	-2.95	0.000434,	0.0168					0.0083
[7111]MF_StateSpace_n4sid_2_05_1_A_1(model):	-2.95	0.000434,	0.0168					0.0083
[2545]FC_Surprise_T1_10_tau_m2quad_500_tstat(information,symbolic):	-2.95	0.000448,	0.0171					0.0083
[3057]FC_LocalSimple_mean1_tauresrat(forecasting):	-2.95	0.000448,	0.0171					0.0083
[209]CO_HistogramAMI_std1_2bin_ami1(information,correlation,AMI):	-2.95	0.000451,	0.0172					0.0083
[1347]SB_TransitionMatrix_31_sumdiagcov(symbolic,transitionmat):	-2.95	0.000458,	0.0172					0.0083
[3540]SB_BinaryStats_mean_meanstretch0(distribution,stationarity):	-2.95	0.000458,	0.0172					0.0083
[2702]PH_Walker_momentum_2_w_ac2(trend):	-2.95	0.000465,	0.0174					0.0083
[3624]SB_MotifTwo_median_dd(symbolic,motifs):	-2.91	0.000502,	0.0187					0.0083
[2352]FC_Surprise_T1_100_4_q_500_lq(information,symbolic):	2.9	0.000509,	0.0187					0.0083
[3638]SB_MotifTwo_median_dddd(symbolic,motifs):	-2.9	0.000509,	0.0187					0.00894
[1157]CO_AddNoise_1_quantiles_10_fitexpa(correlation,AMI,entropy):	2.85	0.000587,	0.02					0.00987
[1308]CO_AddNoise_1_kraskov1_4_fitexpa(correlation,AMI,entropy):	2.85	0.000587,	0.02					0.00987
[1313]CO_AddNoise_1_kraskov1_4_fitlinb(correlation,AMI,entropy):	2.85	0.000587,	0.02					0.00987
[3086]FC_LocalSimple_mean4_taures(forecasting):	2.85	0.000587,	0.02					0.00987
[3135]FC_LocalSimple_median5_ac1(forecasting):	2.85	0.000587,	0.02					0.00987
[3160]FC_LocalSimple_lfit3_stderr(forecasting):	2.85	0.000587,	0.02					0.00987
[6877]MF_steps_ahead_ar_best_6_ac1_6(model,prediction,arfit):	2.85	0.000587,	0.02					0.00987
[6641]MF_arfit_1_8_sbc_stdexctn(modelfit,arfit):	2.85	0.000589,	0.02					0.00987
[6488]WL_coeffs_db3_1_mean_coeff(wavelet):	2.85	0.000589,	0.02					0.0118
[6553]WL_dwtcoeff_db3_5_stdd_l1(wavelet,dwt):	-2.85	0.000593,	0.02					0.0118
[7149]MF_StateSpace_n4sid_3_05_1_A_1(model):	-2.85	0.000593,	0.02					0.0118
[3939]DN_SimpleFit_sin2_resAC2(model):	-2.85	0.000596,	0.02					0.0118
[1153]CO_AddNoise_1_quantiles_10_ami_at_5(correlation,AMI,entropy):	-2.85	0.000601,	0.02					0.0118
[1948]CO_StickAngles_y_ac1_all(correlation):	-2.85	0.000601,	0.02					0.0118
[3137]FC_LocalSimple_median5_taures(forecasting):	-2.85	0.000601,	0.02					0.0118
[214]CO_HistogramAMI_std1_5bin_ami1(information,correlation,AMI):	-2.85	0.000607,	0.02					0.0118
[1185]CO_AddNoise_1_even_10_meanch(correlation,AMI,entropy):	-2.85	0.000607,	0.02					0.0118
[1947]CO_StickAngles_y_tau_all(correlation):	-2.85	0.000607,	0.02					0.0118
[2646]PH_Walker_prop_11_w_propzcross(trend):	-2.85	0.000607,	0.02					0.012
[2681]PH_Walker_biasprop_01_05_w_ac1(trend):	-2.85	0.000607,	0.02					0.012
[3098]FC_LoopLocalSimple_mean_stderr_chn(forecasting):	-2.85	0.000607,	0.02					0.012
[400]IN_AutoMutualInfoStats_diff_20_gaussian_stdami(information,correlation,AMI):	-2.85	0.000615,	0.0201					0.0135
[3622]SB_MotifTwo_mean_hhhh(symbolic,motifs):	-2.85	0.000615,	0.0201					0.0135
[3774]SB_MotifThree_quantile_hhhh(symbolic,motifs):	-2.85	0.000621,	0.0201					0.0135
[6419]WL_cwt_db3_32_medianabsC(wavelet,cwt):	-2.85	0.000628,	0.0203					0.0135
[241]CO_HistogramAMI_even_2bin_ami3(information,correlation,AMI):	-2.85	0.000631,	0.0203					0.0135
[1335]SB_TransitionMatrix_21_ondiag(symbolic,transitionmat):	2.81	0.000654,	0.0209					0.0135
[3663]SB_MotifThree_quantile_cc(symbolic,motifs):	-2.81	0.00067,	0.0213					0.0135
[3626]SB_MotifTwo_median_ud(symbolic,motifs):	-2.81	0.000684,	0.0216					0.0135
[3597]SB_MotifTwo_mean_ddd(symbolic,motifs):	-2.81	0.000689,	0.0217					0.0135
[3567]SB_MotifTwo_diff_ddu(symbolic,motifs):	2.77	0.000774,	0.0234					0.0135
[191]AC_nl_223(correlation,nonlinearautocorr):	2.76	0.000795,	0.0234					0.0135
[2589]PH_Walker_prop_01_sw_ac1rat(trend):	2.76	0.000795,	0.0234					0.0135
[2641]PH_Walker_prop_11_w_ac1(trend):	2.76	0.000795,	0.0234					0.0135
[3069]FC_LocalSimple_mean3_meanabserr(forecasting):	2.76	0.000795,	0.0234					0.0135
[7113]MF_StateSpace_n4sid_2_05_1_A_3(model):	2.76	0.000795,	0.0234					0.0135
[915]ApEn1_02(entropy):	2.76	0.000797,	0.0234					0.0135
[2091]NW_VisibilityGraph_norm_propmode(network,visibilityGraph):	2.76	0.000797,	0.0234					0.0135
[1360]SB_TransitionMatrix_41_sumdiagcov(symbolic,transitionmat):	2.76	0.000802,	0.0234					0.0135
[2680]PH_Walker_biasprop_01_05_w_std(trend):	2.76	0.000802,	0.0234					0.0135
[254]CO_HistogramAMI_quantiles_2bin_ami1(information,correlation,AMI):	2.76	0.000809,	0.0234					0.0168
[1339]SB_TransitionMatrix_21_stdeig(symbolic,transitionmat):	2.76	0.000809,	0.0234					0.0168
[1341]SB_TransitionMatrix_21_mineig(symbolic,transitionmat):	2.76	0.000809,	0.0234					0.0168
[1342]SB_TransitionMatrix_21_sumdiagcov(symbolic,transitionmat):	-2.76	0.000809,	0.0234					0.0168
[2208]SY_SpreadRandomLocal_200_100_meanac1(stationarity):	-2.76	0.000809,	0.0234					0.0168
[2557]FC_Surprise_T1_50_tau_m2quad_500_median(information,symbolic):	-2.76	0.000809,	0.0234					0.0168
[3136]FC_LocalSimple_median5_ac2(forecasting):	-2.76	0.000809,	0.0234					0.0171
[3628]SB_MotifTwo_median_hh(symbolic,motifs):	-2.76	0.000809,	0.0234					0.0171
[7531]SY_PPtest_0_5_ar_t1_maxstat(unitroot):	-2.76	0.000811,	0.0234					0.0172
[3067]FC_LocalSimple_mean2_tauresrat(forecasting):	-2.76	0.000818,	0.0234					0.0172
[3077]FC_LocalSimple_mean3_tauresrat(forecasting):	-2.76	0.000818,	0.0234					0.0172
[1471]SB_TransitionpAlphabet_40_1_stdeigfexp_b(symbolic,transitionmat):	-2.76	0.000827,	0.0234					0.0187
[7104]MF_StateSpace_n4sid_1_05_1_dwts(model):	-2.76	0.000827,	0.0234					0.0187
[1267]CO_AddNoise_1_gaussian_ami_at_10(correlation,AMI,entropy):	-2.76	0.000836,	0.0234					0.0187
[1377]SB_TransitionMatrix_51_sumdiagcov(symbolic,transitionmat):	-2.76	0.000836,	0.0234					0.02
[3605]SB_MotifTwo_mean_hhh(symbolic,motifs):	-2.76	0.000836,	0.0234					0.02
[4490]SP_Summaries_welch_rect_fpoly2csS_p3(FourierSpectrum):	-2.76	0.000843,	0.0234					0.02
[4614]SP_Summaries_fft_fpoly2csS_p3(FourierSpectrum):	-2.76	0.000843,	0.0234					0.02
[196]RM_ami_3(information,correlation,AMI):	-2.76	0.00085,	0.0234					0.02
[6313]MF_GP_hyperparameters_covSEiso_covPeriodic_covNoise_1_200_resample_minS(model,GaussianProcess):	-2.76	0.00085,	0.0234					0.02
[2612]PH_Walker_prop_05_sw_propcross(trend):	2.72	0.000886,	0.0243					0.02
[3691]SB_MotifThree_quantile_ccc(symbolic,motifs):	-2.72	0.0009,	0.0246					0.02
[3578]SB_MotifTwo_diff_dduu(symbolic,motifs):	2.68	0.00105,	0.0279					0.02
[7277]MF_armax_1_1_05_1_ac2(model):	2.67	0.00106,	0.0279					0.02
[7280]MF_armax_1_1_05_1_ac2n(model):	2.67	0.00106,	0.0279					0.02
[264]CO_HistogramAMI_quantiles_10bin_ami1(information,correlation,AMI):	2.67	0.00106,	0.0279					0.0201
[6714]NL_MS_nlpe_fnn_mi_msqerr(nonlinear,prediction,model,slow):	2.67	0.00106,	0.0279					0.0201
[1974]CO_Embed2_tau_histent(correlation,embedding):	2.67	0.00106,	0.0279					0.0209
[4163]SC_FluctAnal_2_dfa_50_2_logi_se1(scaling):	2.67	0.00106,	0.0279					0.0213
[4164]SC_FluctAnal_2_dfa_50_2_logi_se2(scaling):	2.67	0.00106,	0.0279					0.0216
[1520]CO_AutoCorrShape_drown_sumacf(correlation):	-2.67	0.00106,	0.0279					0.0217
[5973]PP_Compare_diff2_swss10_1(preprocessing,raw,stationarity):	-2.67	0.00106,	0.0279					0.0234
[754]SY_StdNthDer_2(entropy):	-2.67	0.00107,	0.028					0.0234
[3637]SB_MotifTwo_median_hhh(symbolic,motifs):	-2.67	0.00108,	0.028					0.0234
[1192]CO_AddNoise_1_even_10_ami_at_10(correlation,AMI,entropy):	-2.67	0.00109,	0.028					0.0234
[5672]SD_TSTL_surrogates_1_100_1_trev_stdsurr(nonlinear,tstool,correlation,surrogate):	-2.67	0.00109,	0.028					0.0234
[3101]FC_LoopLocalSimple_mean_stderr_peaksize(forecasting):	-2.67	0.00111,	0.0285					0.0234
[271]IN_AutoMutualInfoStats_40_gaussian_ami3(information,correlation,AMI):	-2.67	0.00113,	0.0286					0.0234
[3016]EN_Randomize_permute_ac3fexpa(entropy,slow):	-2.67	0.00113,	0.0286					0.0234
[6294]MF_GP_hyperparameters_covSEiso_covNoise_1_200_resample_mlikelihood(model,GaussianProcess):	-2.67	0.00113,	0.0286					0.0234
[3785]SB_MotifThree_diffquant_aaa(symbolic,motifs):	-2.63	0.00119,	0.0301					0.0234
[3627]SB_MotifTwo_median_uu(symbolic,motifs):	-2.63	0.00123,	0.0309					0.0234
[2607]PH_Walker_prop_05_sw_meanabsdiff(trend):	2.59	0.0014,	0.0336					0.0234
[3087]FC_LocalSimple_mean4_tauresrat(forecasting):	2.58	0.0014,	0.0336					0.0234
[3146]FC_LocalSimple_median7_ac2(forecasting):	2.58	0.0014,	0.0336					0.0234
[1053]DK_crinkle_statistic(misc):	2.58	0.0014,	0.0336					0.0234
[1195]CO_AddNoise_1_even_10_fitexpa(correlation,AMI,entropy):	2.58	0.0014,	0.0336					0.0234
[2979]EN_Randomize_dyndist_swss5_1fexpa(entropy,slow,stationarity):	2.58	0.0014,	0.0336					0.0234
[3075]FC_LocalSimple_mean3_ac2(forecasting):	2.58	0.0014,	0.0336					0.0234
[6591]MF_arfit_1_8_sbc_A1(modelfit,arfit):	2.58	0.0014,	0.0336					0.0234
[6717]NL_MS_nlpe_fnn_mi_stde(nonlinear,prediction,model,slow):	2.58	0.0014,	0.0336					0.0234
[7268]MF_armax_1_1_05_1_stde(model):	2.58	0.0014,	0.0336					0.0234
[7269]MF_armax_1_1_05_1_mms(model):	2.58	0.0014,	0.0336					0.0234
[2729]PH_Walker_momentum_5_sw_ac1rat(trend):	2.58	0.0014,	0.0336					0.0243
[3570]SB_MotifTwo_diff_udd(symbolic,motifs):	2.58	0.00141,	0.0336					0.0246
[3128]FC_LocalSimple_median3_tauresrat(forecasting):	2.58	0.00143,	0.0336					0.0279
[3654]SB_MotifTwo_median_hhhh(symbolic,motifs):	2.58	0.00143,	0.0336					0.0279
[4521]SP_Summaries_welch_rect_linfitloglog_mf_sigma(FourierSpectrum):	2.58	0.00143,	0.0336					0.0279
[4522]SP_Summaries_welch_rect_linfitloglog_mf_sea1(FourierSpectrum):	2.58	0.00143,	0.0336					0.0279
[4645]SP_Summaries_fft_linfitloglog_mf_sigma(FourierSpectrum):	2.58	0.00143,	0.0336					0.0279
[4646]SP_Summaries_fft_linfitloglog_mf_sea1(FourierSpectrum):	2.58	0.00143,	0.0336					0.0279
[3150]FC_LocalSimple_lfit2_meanabserr(forecasting):	-2.58	0.00144,	0.0336					0.028
[5550]NL_TSTL_LargestLyap_n1_01_001_3_1_4_maxp(nonlinear,tstool):	-2.58	0.00144,	0.0336					0.028
[5570]NL_TSTL_LargestLyap_n1_01_001_3_1_4_expfit_a(nonlinear,tstool):	-2.58	0.00144,	0.0336					0.0285
[1840]CO_TranslateShape_circle_15_pts_std(correlation):	-2.58	0.00146,	0.0337					0.0286
[3596]SB_MotifTwo_mean_hh(symbolic,motifs):	-2.58	0.00146,	0.0337					0.0286
[95]AC_3(correlation):	-2.58	0.00148,	0.034					0.0301
[1135]CO_trev_3_denom(correlation,nonlinear):	-2.58	0.00148,	0.034					0.0309
[1372]SB_TransitionMatrix_51_TD5(symbolic,transitionmat):	2.56	0.00151,	0.0345					0.0336
[3625]SB_MotifTwo_median_du(symbolic,motifs):	2.55	0.00153,	0.035					0.0336
[3587]SB_MotifTwo_diff_uudd(symbolic,motifs):	2.55	0.00156,	0.0355					0.0336
[2336]FC_Surprise_T1_20_2_q_500_lq(information,symbolic):	-2.55	0.00163,	0.0368					0.0336
[2558]FC_Surprise_T1_50_tau_m2quad_500_lq(information,symbolic):	2.5	0.00179,	0.0398					0.0336
[3773]SB_MotifThree_quantile_cccc(symbolic,motifs):	-2.5	0.00181,	0.0398					0.0336
[3147]FC_LocalSimple_median7_taures(forecasting):	-2.5	0.00183,	0.0398					0.0336
[192]AC_nl_233(correlation,nonlinearautocorr):	2.49	0.00183,	0.0398					0.0336
[4335]SP_Summaries_pgram_hamm_w_weighted_peak_height(FourierSpectrum):	2.49	0.00183,	0.0398					0.0336
[6957]MF_FitSubsegments_ar_2_uniform_25_01_a_1_mean(model,prediction):	2.49	0.00183,	0.0398					0.0336
[4190]SC_FluctAnal_2_dfa_50_3_logi_resac1(scaling):	2.49	0.00184,	0.0398					0.0336
[7342]MF_ExpSmoothing_05_best_p1_5(model):	2.49	0.00184,	0.0398					0.0336
[2749]PH_Walker_runningvar_15_50_sw_ac1rat(trend):	2.49	0.00184,	0.0398					0.0336
[2648]PH_Walker_prop_11_sw_taudiff(trend):	2.49	0.00185,	0.0398					0.0336
[6923]MF_steps_ahead_arma_3_1_6_ac1_6(model,prediction):	2.49	0.00185,	0.0398					0.0337
[188]AC_nl_113(correlation,nonlinearautocorr):	-2.49	0.00186,	0.0398					0.0345
[3899]MF_AR_arcov_2_a2(model,fit):	-2.49	0.00186,	0.0398					0.035
[6917]MF_steps_ahead_arma_3_1_6_ac1_4(model,prediction):	-2.49	0.00186,	0.0398					0.0355
[7094]MF_StateSpace_n4sid_1_05_1_ac1(model):	-2.49	0.00186,	0.0398					0.0368
[7097]MF_StateSpace_n4sid_1_05_1_ac1n(model):	-2.49	0.00186,	0.0398					0.0398
[244]CO_HistogramAMI_even_5bin_ami1(information,correlation,AMI):	-2.49	0.00188,	0.0398					0.0398
[2584]PH_Walker_prop_01_w_min(trend):	-2.49	0.00188,	0.0398					0.0398
[6445]WL_cwt_sym2_32_medianabsC(wavelet,cwt):	-2.49	0.00188,	0.0398					0.0398
[7523]SY_VarRatioTest_24682468_00001111_minstat(vratiotest):	-2.49	0.00188,	0.0398					0.0398
[1343]SB_TransitionMatrix_31_ondiag(symbolic,transitionmat):	-2.49	0.00189,	0.0399					0.0398
[4141]SC_FluctAnal_2_dfa_50_1_logi_ssr(scaling):	-2.49	0.00189,	0.0399					0.0398
[251]CO_HistogramAMI_even_10bin_ami3(information,correlation,AMI):	-2.49	0.00191,	0.0399					0.0398
[6297]MF_GP_hyperparameters_covSEiso_covNoise_1_200_resample_std_mu_data(model,GaussianProcess):	-2.49	0.00191,	0.0399					0.0398
[6979]MF_FitSubsegments_arma_2_2_uniform_25_01_p_2_mean(model,prediction):	-2.49	0.00191,	0.0399					0.0398
[1833]DN_RemovePoints_max_08_saturate_ac3diff(correlation,outliers):	-2.49	0.00192,	0.04					0.0398
[3629]SB_MotifTwo_median_ddd(symbolic,motifs):	-2.49	0.00194,	0.0401					0.0398
[88]ST_SimpleStats_zcross(noisiness):	2.45	0.00207,	0.0427					0.0398
[3636]SB_MotifTwo_median_uuu(symbolic,motifs):	-2.45	0.00209,	0.0431					0.0398
[5220]NL_TSTL_dimensions_50_ac_fnnmar_scr_bc_m2_pgone(nonlinear,tstool,scaling,dimension):	2.41	0.00228,	0.0467					0.0398
[3594]SB_MotifTwo_mean_dd(symbolic,motifs):	2.41	0.00236,	0.0473					0.0399
[224]CO_HistogramAMI_std2_2bin_ami1(information,correlation,AMI):	2.41	0.00237,	0.0473					0.0399
[6592]MF_arfit_1_8_sbc_A2(modelfit,arfit):	2.41	0.00237,	0.0473					0.0399
[4334]SP_Summaries_pgram_hamm_w_weighted_peak_prom(FourierSpectrum):	2.41	0.00237,	0.0473					0.0399
[857]SY_LocalGlobal_AC1_unicg500(stationarity):	2.41	0.00237,	0.0473					0.0401
[2793]EN_SampEn_5_01_diff1_sampen0(entropy,sampen,controlen):	2.41	0.00237,	0.0473					0.0427
[1481]SB_TransitionpAlphabet_40_1_mineigfexp_rmse(symbolic,transitionmat):	2.41	0.00238,	0.0473					0.0431
[3942]DN_SimpleFit_sin3_resAC1(model):	-2.41	0.00238,	0.0473					0.0473
[7087]MF_StateSpace_n4sid_1_05_1_mms(model):	-2.41	0.00238,	0.0473					0.0473
[3935]DN_SimpleFit_sin1_resAC2(model):	-2.41	0.00239,	0.0473					0.0473
[1238]CO_AddNoise_1_std1_10_fitlinb(correlation,AMI,entropy):	-2.41	0.00239,	0.0473					0.0473
[5821]PP_Compare_sin2_gauss1_kd_rmse(preprocessing,raw):	-2.41	0.00239,	0.0473					0.0473
[3934]DN_SimpleFit_sin1_resAC1(model):	-2.41	0.0024,	0.0473					0.0473
[2161]SY_SpreadRandomLocal_ac5_100_meanac2(stationarity):	-2.41	0.00241,	0.0474					0.0473
[6699]NL_MS_nlpe_3_ac_ac2(nonlinear,prediction,model):	-2.41	0.00243,	0.0474					0.0473
[6702]NL_MS_nlpe_3_ac_ac2n(nonlinear,prediction,model):	-2.41	0.00243,	0.0474					0.0473
[1193]CO_AddNoise_1_even_10_ami_at_15(correlation,AMI,entropy):	-2.41	0.00245,	0.0474					0.0473
[5679]SD_TSTL_surrogates_mi_100_1_trev_stdsurr(nonlinear,tstool,correlation,surrogate):	-2.41	0.00245,	0.0474					0.0474
[6920]MF_steps_ahead_arma_3_1_6_ac1_5(model,prediction):	-2.41	0.00245,	0.0474					0.0474
[2552]FC_Surprise_T1_20_tau_m2quad_500_std(information,symbolic):	-2.41	0.00247,	0.0474					0.0474
[6307]MF_GP_hyperparameters_covSEiso_covPeriodic_covNoise_1_200_resample_mlikelihood(model,GaussianProcess):	-2.41	0.00247,	0.0474					0.0474
[6310]MF_GP_hyperparameters_covSEiso_covPeriodic_covNoise_1_200_resample_std_mu_data(model,GaussianProcess):	2.4	0.00247,	0.0474					0.0474
[3599]SB_MotifTwo_mean_dud(symbolic,motifs):	2.4	0.00258,	0.0494					0.0494
